# Supplementary material for: Improving Melanoma Classification by Integrating Genetic and Morphologic Features
Source: PLOS journal article supplement (doi:10.1371/journal.pmed.0050120), 2008-05-29
Supplement: S7 (10.1371/journal.pmed.0050120.s007) [file journal.pmed.0050120.s007]

| **SUPERFICIAL SPREADING MELANOMA** | | | | | |
| --- | --- | --- | --- | --- | --- |
| **CLINICAL CHARACTERISTICS** | | n(%) | **BRAF Mutation** | **BRAF wt** | **p value** |
| n(%) | n(%) |  |
| **ACRAL, CSD, noCSD GROUPING** | noCSD | 118 (62·4) | 72 (61) | 46 (39) | 0·004 |
|  | CSD | 59 (31·2) | 21 (35·6) | 38 (64·4) | 0·001 |
|  | Acral | 12 (6·3) | 5 (41·7) | 7 (58·3) | 0·2 |
|  | Total | 189 (100) | 98 (51·9) | 91 (48·1) |  |
| **ANATOMIC SITE** | Face/Scalp | 21 (11·1) | 8 (38·1) | 13 (61·9) | 0·06 |
|  | Trunk | 82 (43·4) | 50 (61) | 32 (39) | 0·09 |
|  | Upper Ext | 24 (12·7) | 8 (33·3) | 16 (66·7) | 0·02 |
|  | Lower Ext | 45 (23·8) | 24 (53·3) | 21 (46·7) | 0·4 |
|  | Acral | 9 (4·8) | 4 (44·4) | 5 (55·6) | 0·3 |
|  | Total | 181(95·8) | 94 (51·9) | 87 (48·1) |  |
| **GENDER** | Female | 85 (45) | 52 (61·2) | 33 (38·8) | 0·05 |
|  | Male | 93 (49·2) | 43 (46·2) | 50 (53·8) |  |
|  | Total | 178 (94·2) | 95 (53·4) | 83 (46·6) |  |
| **AGE [yrs]** |  | 56·5 (25)1 | 50 (26·3)1 | 63 (21)1 | <0·0001 |
| **THICKNESS [mm]** |  | 1 (1·55)1 | 0·8 (1·4)1 | 1 (1·8)1 | 0·6 |
|  |  |  |  |  |  |
| **MORPHOLOGICAL CHARACTERISTICS** | | n(%) | **BRAF Mutation** | **BRAF wt** | **p value** |
| n(%) | n(%) |  |
| **SCATTER** | Absent | 34 (18) | 1 (1) | 33 (36·3) | <0·0001 |
|  | Slight | 76 (40·2) | 43 (43·9) | 33 (36·3) |  |
|  | Medium | 43 (22·8) | 30 (30·6) | 13 (14·2) |  |
|  | Prominent | 25 (13·2) | 20 (20·4) | 5 (5·5) |  |
|  | Total | 178 (94·2) | 94 (95·9) | 84 (92·3) |  |
| **PIGMENTATION** | Absent | 23 (12·2) | 3 (3·1) | 20 (21·9) | <0·0001 |
|  | Slight | 43 (22·8) | 16 (16·3) | 27 (29·7) |  |
|  | Medium | 52 (27·5) | 28 (28·6) | 24 (26·4) |  |
|  | High | 36 (19) | 24 (24·5) | 12 (13·2) |  |
|  | Very high | 32 (16·9) | 27 (27·5) | 5 (5·5) |  |
|  | Total | 186 (98·4) | 98 (100) | 88 (96·7) |  |
| **NESTING** | Absent | 12 (6·4) | 0 | 12 (13·2) | <0·0001 |
|  | Slight | 38 (20·1) | 14 (14·3) | 24 (26·3) |  |
|  | Medium | 52 (27·5) | 24 (24·5) | 28 (30·8) |  |
|  | Prominent | 76 (40·2) | 56 (57·1) | 20 (22) |  |
|  | Total | 178 (94·2) | 94 (95·9) | 84 (92·3) |  |
| **CIRCUMSCRIPTION** | Abrupt | 92 (48·7) | 60 (61·2) | 32 (35·2) | 0·0007 |
|  | Continuous | 59 (31·2) | 25 (25·5) | 34 (37·4) |  |
|  | Discontinuous | 15 (7·9) | 4 (4·1) | 11 (12·1) |  |
|  | Total | 166 (87·8) | 89 (90·8) | 77 (84·7) |  |
| **EPIDERMAL CONTOUR** | Atrophy | 1 (0·5) | 0 | 1(1·1) | 0·12 |
|  | Effacement | 16 (8·5) | 6 (6·1) | 10 (11) |  |
|  | Normal | 22 (11·6) | 12 (12·3) | 10 (11) |  |
|  | Thickening | 85 (45) | 45 (45·9) | 40 (44) |  |
|  | Hyperplasia | 47 (24·9) | 28 (28·6) | 19 (20·8) |  |
|  | Total | 171 (90·5) | 91 (92·9) | 80 (87·9) |  |
| **SOLAR ELASTOSIS [1-11]** | | 5·5 (3)1 | 5 (2·3)1 | 6 (4)1 | 0·005 |
| **CELL SIZE** | Small | 89 (47·1) | 36 (36·7) | 53 (58·2) | 0·002 |
|  | Medium | 72 (38·1) | 43 (43·9) | 29 (31·9) |  |
|  | Large | 25 (13·2) | 18 (18·4) | 7 (7·7) |  |
|  | Total | 186 (98·4) | 97 (99) | 89 (97·8) |  |
| **CELL SHAPE** | Round | 121 (64·1) | 76 (77·6) | 45 (49·4) | 0·0001 |
|  | Ovoid | 32 (16·9) | 12 (12·3) | 20 (22) |  |
|  | Elongated | 21 (11·1) | 7 (7·1) | 14 (15·4) |  |
|  | Spindled | 12 (6·3) | 2 (2) | 10 (11) |  |
|  | Total | 186 (98·4) | 97 (99) | 89 (97·8) |  |
| **NUCLEAR SIZE** | Small | 126 (66·7) | 59 (60·2) | 67 (73·6) | 0·05 |
|  | Medium | 53 (28) | 33 (33·7) | 20 (22) |  |
|  | Large | 6 (3·2) | 4 (4·1) | 2 (2·2) |  |
|  | Total | 185 (97·9) | 96 (98) | 89 (97·8) |  |
| **NUCLEAR SHAPE [0-1]** |  | 0·73 (0·17)1 | 0·76 (0·1)1 | 0·7 (0·24)1 | 0·0003 |
| **NUCLEOLAR SIZE** | Small | 39 (20·6) | 15 (15·3) | 24 (26·4) | 0·8 |
|  | Medium | 91 (48·2) | 57 (58·2) | 34 (37·4) |  |
|  | Large | 58 (30·7) | 26 (26·5) | 32 (35·1) |  |
|  | Total | 188 (99·5) | 98 (100) | 90 (98·9) |  |
| **ULCERATION** | Yes | 43 (22·8) | 23 (23·5) | 20 (22) | 0·8 |
|  | No | 145 (76·7) | 75 (76·5) | 70 (76·9) |  |
|  | Total | 188 (99·5) | 98 (100) | 90 (98·9) |  |

1 Median and interquartile range

Table S7 Comparison of features within SSMs by mutation status of BRAF and NRAS. Total percentages that do not add up to 100% have missing values.
